# Supplementary material
Source: publisher figshare collection journal article supplement (https://acs.figshare.com/ndownloader/files/22154226)
Supplement: Supplementary file 1 [file 22154226]

## Supporting Information

### **Noble-metal-free Ni–W–O derived catalysts for high-capacity hydrogen production from hydrazine monohydrate**

Qing Shi,<sup>†</sup> Deng-Xue Zhang,<sup>†</sup> Hui Yin,<sup>†</sup> Yu-Ping Qiu,<sup>†</sup> Liang-Liang Zhou,<sup>†</sup> Chen Chen,<sup>†</sup> Hui Wu,<sup>‡</sup> and Ping Wang<sup>†\*</sup>

<sup>†</sup> School of Materials Science and Engineering, Key Laboratory of Advanced Energy Storage Materials of Guangdong Province, South China University of Technology, Guangzhou 510641, P.R. China

<sup>‡</sup> NIST Center for Neutron Research, National Institute of Standards and Technology, Gaithersburg, Maryland 20899-6102, United States

\* Corresponding author. Tel: +86 20 3938 0583

*E-mail address:* mspwang@scut.edu.cn (P. Wang)

Number of pages: 15

Number of figures: 11

Number of tables: 1

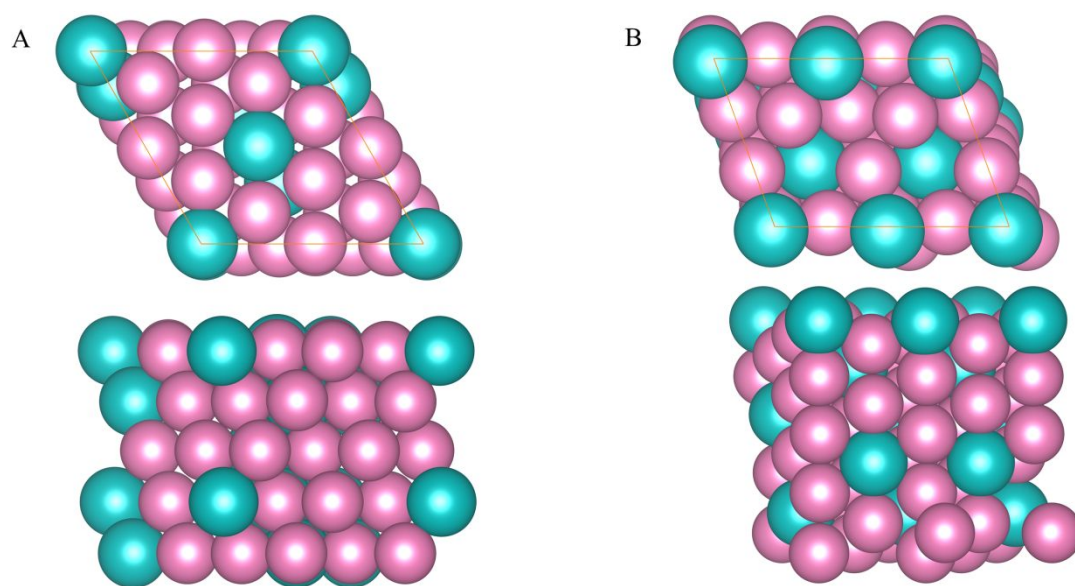

**Figure S1.** Top and front views of the models of (A)  $\text{Ni}_{17}\text{W}_3(111)$ -plane, (B)  $\text{Ni}_4\text{W}(211)$ -plane. The pink and cyan balls denote Ni and W atoms, respectively.

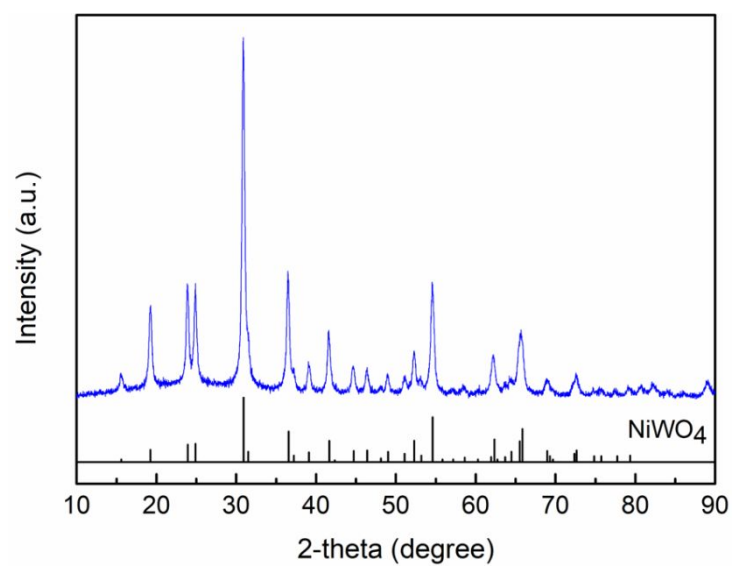

**Figure S2.** XRD pattern of 450 °C-annealed sample under air atmosphere.

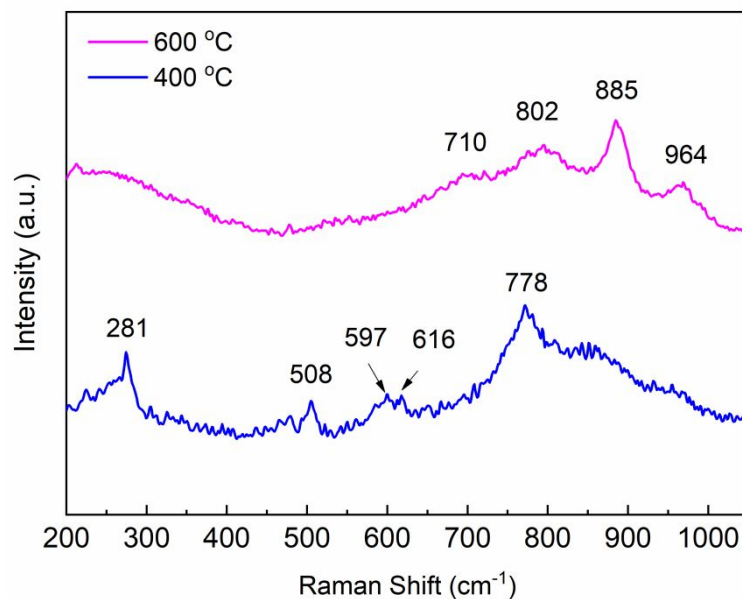

**Figure S3.** Raman spectra of the 400 °C- and 600 °C-reduced samples. For the 400 °C-reduced sample, the bands at 778, 616, 597, 508 and 281  $\text{cm}^{-1}$  can be safely assigned to the characteristic modes of  $\text{WO}_2$ .<sup>1,2</sup> For the 600 °C-reduced sample, the bands at 710, 802 and 964  $\text{cm}^{-1}$  should be ascribed to the vibration modes of  $\text{WO}_3$ . Specifically, the bands at 710 and 802  $\text{cm}^{-1}$  correspond to the symmetric stretching and bending modes of W-O, and the band at 964  $\text{cm}^{-1}$  to the stretching mode of terminal W=O bonds.<sup>3,4</sup> The band at 885  $\text{cm}^{-1}$  was ascribed to the symmetric stretching mode of terminal W=O bonds of the residual  $\text{NiWO}_4$  phase.<sup>5,6</sup>

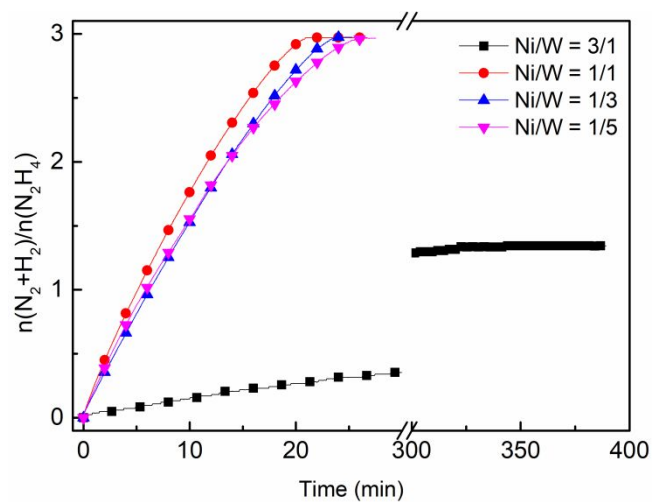

**Figure S4.** The kinetic curves of  $\text{N}_2\text{H}_4\cdot\text{H}_2\text{O}$  decomposition over the reduced catalysts with the different molar ratios of Ni to W precursors at 400 °C  $\text{H}_2$  atmosphere. The catalytic decomposition of  $\text{N}_2\text{H}_4\cdot\text{H}_2\text{O}$  was conducted in a solution (2 mL) of 0.5 M  $\text{N}_2\text{H}_4\cdot\text{H}_2\text{O} + 2.0$  M NaOH at 50 °C.

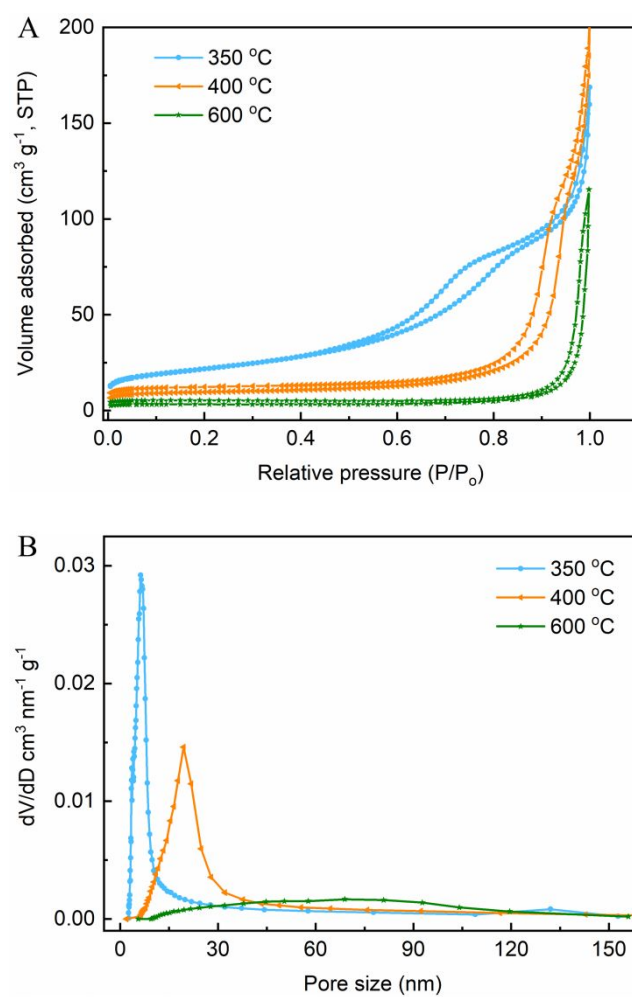

**Figure S5.** (A) N<sub>2</sub> sorption isotherms and (B) the corresponding pore size distribution curves for the samples reduced at various temperatures.

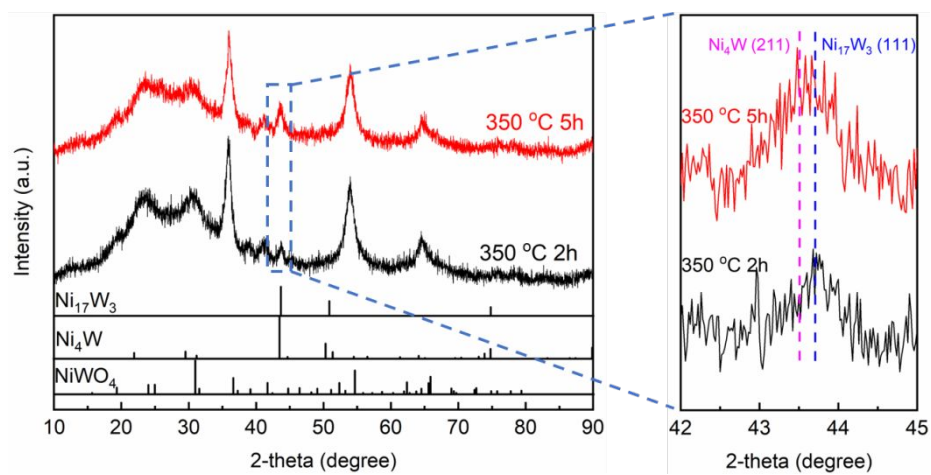

**Figure S6.** XRD patterns of the nanocomposite samples annealed at 350 °C for different time.

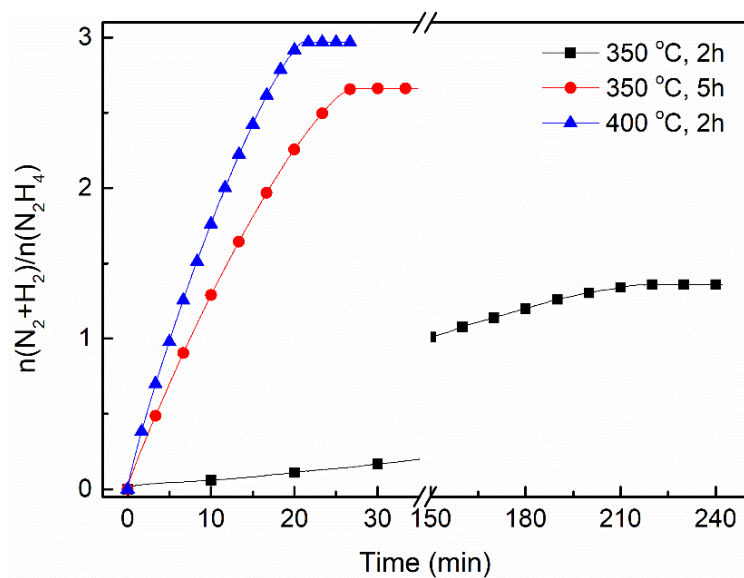

**Figure S7.** The kinetic curves of  $\text{N}_2\text{H}_4\cdot\text{H}_2\text{O}$  decomposition over the reduced catalysts at different temperatures or annealing time. The catalytic decomposition of  $\text{N}_2\text{H}_4\cdot\text{H}_2\text{O}$  was conducted in a solution (2 mL) of 0.5 M  $\text{N}_2\text{H}_4\cdot\text{H}_2\text{O}$  + 2.0 M NaOH at 50 °C.

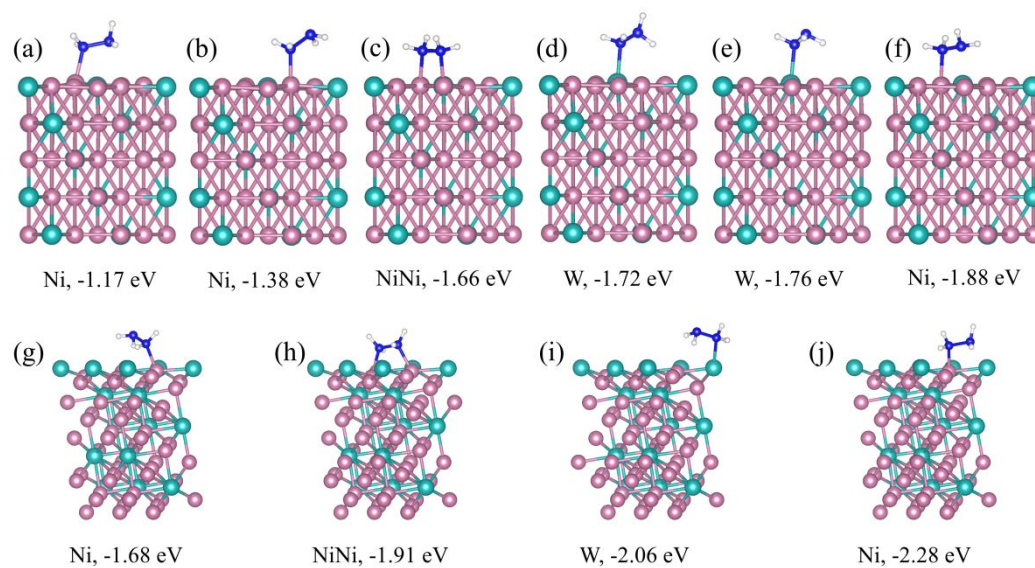

**Figure S8.** Possible adsorption conformations of  $\text{N}_2\text{H}_4$  on (a-f)  $\text{Ni}_{17}\text{W}_3$  (111) and (g-j)  $\text{Ni}_4\text{W}$  (211) surfaces and the corresponding adsorption energies. Same adsorption conformation of  $\text{N}_2\text{H}_4$  can be obtained from different initial conformations after optimization, for example, (i) can be obtained from both anti and gauche configurations of  $\text{N}_2\text{H}_4$  adsorbed on W atom of  $\text{Ni}_4\text{W}$  (211) surface.

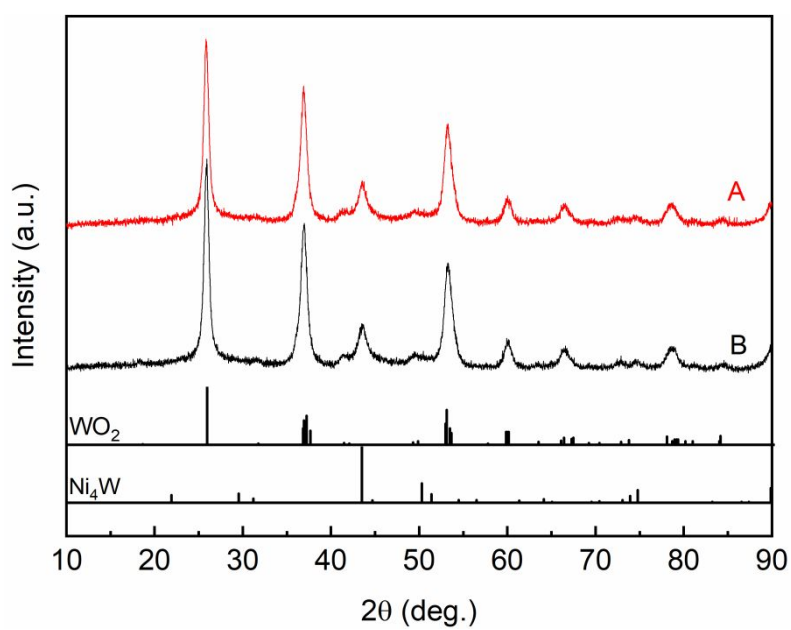

**Figure S9.** XRD patterns of 400 °C-reduced catalyst sample before (A) and after (B) the stability test.

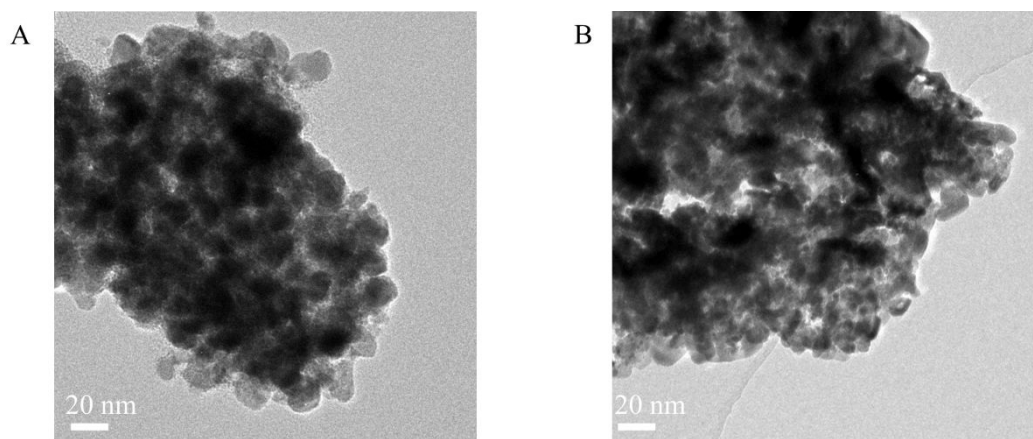

**Figure S10.** TEM images of the 400 °C-reduced catalyst sample before (A) and after (B) the stability test.

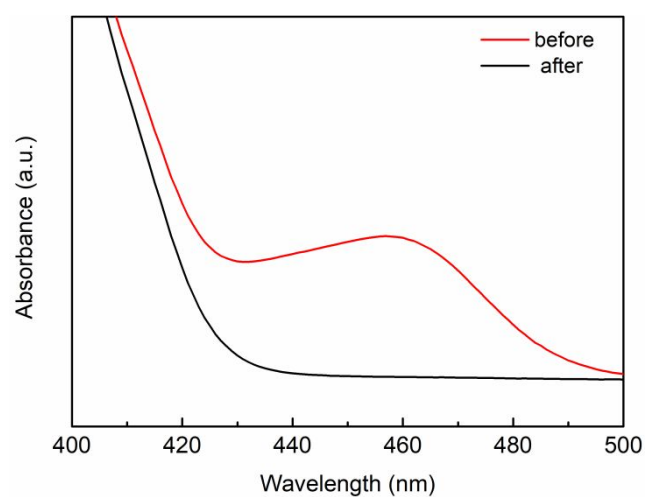

**Figure S11.** UV-vis spectra of hydrous hydrazine solution before and after the catalytic decomposition reaction over the 400 °C-reduced catalyst sample.

**Table S1.** Comparison of catalytic performance of the noble-metal-free catalysts towards hydrogen generation from  $\text{N}_2\text{H}_4 \cdot \text{H}_2\text{O}$ .

| Catalyst                                             | Reaction rate ( $\text{h}^{-1}$ ) | Selectivity (%) | Temperature ( $^{\circ}\text{C}$ ) | Activity attenuation <sup>a</sup> (%) | Reference |
|------------------------------------------------------|-----------------------------------|-----------------|------------------------------------|---------------------------------------|-----------|
| NiMoB-La(OH) <sub>3</sub>                            | 13.3                              | 100             | 50                                 | 52                                    | 7         |
| Ni-Al <sub>2</sub> O <sub>3</sub> -HT                | 2.0                               | 93              | 50                                 | 40                                    | 8         |
| Ni <sub>10</sub> Mo/Ni-Mo-O                          | 54.5                              | 97              | 50                                 | <5                                    | 9         |
| NiCO/NiO-CoO <sub>x</sub>                            | 5.49                              | 99              | 25                                 | 30                                    | 10        |
| 2D NiFe/CeO <sub>2</sub>                             | 5.73                              | 99              | 50                                 | 35                                    | 11        |
| 6 wt%Ni/CeO <sub>2</sub>                             | 34.0                              | 100             | 50                                 | 15 <sup>b</sup>                       | 12        |
| Ni nanofiber                                         | 6.9                               | 100             | 60                                 | 24 <sup>c</sup>                       | 13        |
| NiFe/CeZrO <sub>2</sub>                              | 24.7                              | 100             | 50                                 | 48 <sup>c</sup>                       | 14        |
| Ni <sub>4</sub> W/WO <sub>2</sub> /NiWO <sub>4</sub> | 33                                | 99              | 50                                 | <5                                    | This work |

<sup>a</sup> Activity attenuation after 10 cyclic usage; <sup>b</sup> 3 cyclic usage; <sup>c</sup> 5 cyclic usage.

## References

- (1) Liu, F.; Li, L.; Mo, F.; etc. A Catalyzed-Growth route to directly form micropatterned WO<sub>2</sub> and WO<sub>3</sub> nanowire arrays with excellent field emission behaviors at low temperature. *Cryst. Growth Des.* **2010**, *10*, 5193–5199.
- (2) Frey, G. L.; Rothschild, A.; Sloan, J.; etc. Investigations of nonstoichiometric tungsten oxide nanoparticles. *J. Solid State Chem.* **2001**, *162*, 300–313.
- (3) Fang, G.; Liu, Z.; Yao, K. L. Fabrication and characterization of electrochromic nanocrystalline WO<sub>3</sub>/Si(111) thin films for infrared emittance modulation applications. *J. Phys. D: Appl. Phys.* **2001**, *34*, 2260–2266.
- (4) Kim, D. S.; Ostromecki, M.; Wachs, I. E. Preparation and characterization of WO<sub>3</sub>/SiO<sub>2</sub> catalysts. *Catal. Lett.* **1995**, *33*, 209–215.
- (5) Xing, X.; Wang, J.; Reduced graphene oxide incorporated NiWO<sub>4</sub> for high-performance energy storage. *J Mater Sci: Mater Electron* **2016**, *27* (11), 11613–11622.
- (6) Xu, X.; Pei, L.; Yang, Y.; etc. Facile synthesis of NiWO<sub>4</sub>/reduced graphene oxide nanocomposite with excellent capacitive performance for supercapacitors. *J. Alloys Compd.* **2016**, *654*, 23–31.
- (7) Zhang, J.; Kang, Q.; Yang, Z.; etc. A cost-effective NiMoB-La(OH)<sub>3</sub> catalyst for hydrogen generation from decomposition of alkaline hydrous hydrazine solution. *J. Mater. Chem. A* **2013**, *1* (38), 11623–11628.

- (8) He, L.; Huang, Y.; Wang, A.; etc. A noble-metal-free catalyst derived from Ni-Al hydrotalcite for hydrogen generation from  $\text{N}_2\text{H}_4\cdot\text{H}_2\text{O}$  decomposition. *Angew. Chem. Int. Ed.* **2012**, *51* (25), 6191–6194.
- (9) Qiu, Y. P.; Cao, G. X.; Wen, H.; etc. High-capacity hydrogen generation from hydrazine monohydrate using a noble-metal-free  $\text{Ni}_{10}\text{Mo}/\text{Ni-Mo-O}$  nanocatalyst. *Int. J. Hydrogen Energy*, **2019**, *44* (29), 15110–15117.
- (10) Wu, D.; Wen, M.; Lin, X.; etc. A  $\text{NiCo}/\text{NiO-CoO}_x$  ultrathin layered catalyst with strong basic sites for high-performance  $\text{H}_2$  generation from hydrous hydrazine. *J. Mater. Chem. A*, **2016**, *4* (17), 6595–6602.
- (11) Wu, D.; Wen, M.; Gu, C.; etc. 2D  $\text{NiFe}/\text{CeO}_2$  basic-site-enhanced catalyst via in-situ topotactic reduction for selectively catalyzing the  $\text{H}_2$  generation from  $\text{N}_2\text{H}_4\cdot\text{H}_2\text{O}$ . *ACS Appl. Mater. Interfaces* **2017**, *9* (19), 16103–16108.
- (12) Kang, W.; Varma, A. Hydrogen generation from hydrous hydrazine over  $\text{Ni}/\text{CeO}_2$  catalysts prepared by solution combustion synthesis. *Appl. Catal. B* **2018**, *220*, 409–416.
- (13) Fu, Q.; Yang, P.; Wang, J.; etc. In situ synthesis of Ni nanofibers via vacuum thermal reduction and their efficient catalytic properties for hydrogen generation. *J. Mater. Chem. A* **2018**, *6* (24), 11370–11376.
- (14) Zou, H.; Yao, Q.; Huang, M.; etc. Noble-metal-free  $\text{NiFe}$  nanoparticles immobilized on nano  $\text{CeZrO}_2$  solid solutions for highly efficient hydrogen production from hydrous hydrazine. *Sustainable Energy Fuels*, **2019**, *3*, 3071–3077.
